# Supplementary material
Source: PubMed Central journal article supplement (PMC8317348)
Supplement: 13054_2021_3667_MOESM3_ESM.pdf [file 13054_2021_3667_MOESM3_ESM.pdf]

### ADDITIONAL FILE 3

**Title: Static compliance and driving pressure are associated with ICU mortality in intubated COVID-19 ARDS.**

**Authors:** Annalisa Boscolo<sup>1\*</sup> MD, Nicolò Sella<sup>2\*</sup> MD, Giulia Lorenzoni<sup>3</sup> PhD, Tommaso Pettenuzzo<sup>1</sup> MD, Laura Pasin<sup>1</sup> MD, Chiara Pretto<sup>2</sup> MD, Martina Tocco<sup>2</sup> MD, Enrico Tamburini<sup>2</sup> MD, Alessandro De Cassai<sup>1</sup> MD, Paolo Rosi<sup>4</sup> MD, Enrico Polati<sup>5</sup> MD, Katia Donadello<sup>5</sup> MD, Leonardo Gottin<sup>5</sup> MD, Silvia De Rosa<sup>6</sup> MD, Fabio Baratto<sup>7</sup> MD, Fabio Toffoletto<sup>8</sup> MD, V. Marco Ranieri<sup>9</sup> MD, Dario Gregori<sup>3</sup> PhD, Paolo Navalesi<sup>1,2</sup> MD, FERS, for the COVID-19 VENETO ICU Network<sup>o</sup>.

*\*These authors equally contributed to this work.*

*<sup>o</sup>Listed in the Acknowledgment section.*

### Additional file 3. Multicollinearity analysis.

|                                                                          | <b>MODEL 1</b> |                                                  | <b>MODEL 2</b> |
|--------------------------------------------------------------------------|----------------|--------------------------------------------------|----------------|
| <i>Age (years)</i>                                                       | 1.45           | <i>Age (years)</i>                               | 1.53           |
| <i>Gender (male)</i>                                                     | 1.33           | <i>Gender (male)</i>                             | 1.23           |
| <i>BMI (kg/m<sup>2</sup>)</i>                                            | 1.62           | <i>BMI (kg/m<sup>2</sup>)</i>                    | 1.66           |
| <i>SOFA score at ICU admission</i>                                       | 1.15           | <i>SOFA score at ICU admission</i>               | 1.25           |
| <i>Charlson comorbidity index</i>                                        | 1.19           | <i>Charlson comorbidity index</i>                | 1.66           |
| <i>pH*</i>                                                               | -              | <i>pH*</i>                                       | -              |
| <i>PaO<sub>2</sub>/FiO<sub>2</sub> (mmHg)</i>                            | 1.27           | <i>PaO<sub>2</sub>/FiO<sub>2</sub> (mmHg)</i>    | 1.21           |
| <i>PaCO<sub>2</sub> (mmHg)</i>                                           | 1.61           | <i>PaCO<sub>2</sub> (mmHg)</i>                   | 1.49           |
| <i>Tidal volume (ml/kg of ideal body weight)</i>                         | 1.67           | <i>Tidal volume (ml/kg of ideal body weight)</i> | 1.67           |
| <i>Set respiratory rates (breaths/min)</i>                               | 1.75           | <i>Set respiratory rates (breaths/min)</i>       | 1.75           |
| <i>Total PEEP (cmH<sub>2</sub>O)*</i>                                    | -              | <i>Total PEEP (cmH<sub>2</sub>O)*</i>            | -              |
| <i>Plateau pressure (cmH<sub>2</sub>O)*</i>                              | -              | <i>Plateau pressure (cmH<sub>2</sub>O)*</i>      | -              |
| <i>Static compliance of the respiratory system (ml/cmH<sub>2</sub>O)</i> | 1.31           | <i>Driving pressure (cmH<sub>2</sub>O)</i>       | 1.21           |

The association between ICU mortality and static compliance of respiratory system was investigated by model 1, and the association between ICU mortality and driving pressure by model 2.

\*: Variables excluded from model 1 and 2 due to multicollinearity, which was defined by GVIF<sup>(1/(2×DF))</sup> value greater than 2.

**Abbreviations:** BMI: body mass index; SOFA: sequential organ failure assessment; ICU: intensive care unit; PaO<sub>2</sub>: partial pressure of arterial oxygen; PaO<sub>2</sub>/FiO<sub>2</sub>: ratio between partial pressure of arterial oxygen and fraction of inspired oxygen; PaCO<sub>2</sub>: partial pressure of carbon dioxide; PEEP: positive end-expiratory pressure.
